# Supplementary material for: Method to incorporate green chemistry principles in early-stage product design for sustainability: case studies with personal care products
Source: Royal Society of Chemistry journal article supplement (doi:10.1039/d2gc00842d), 2022-01-01
Supplement: d2gc00842d1.pdf [file d2gc00842d1.pdf]

## Data Selection Process for Formulas and Ingredients

Ingredients in PCP formulas were identified by the International Nomenclature of Cosmetic Ingredients (INCI) name, and in most cases, one or more associated Chemical Abstracts Service registry numbers (CASRNs). To estimate environmental impact, the chemical structure of the ingredient is necessary. Simplified molecular-input line-entry system (SMILES) structures were obtained using the US EPA CompTox Chemicals Dashboard internet database in batch mode with CASRNs as input. Missing structures were determined using other authoritative databases (e.g., Royal Society of Chemistry's ChemSpider, US NIH's CACTUS). For mixtures, we used sources describing the component chemical structures including manufacturers' documentation available on UL Prospector and European Chemicals Agency internet databases.

The tool was constructed to automatically use the results of quantitative structure activity relationship (QSAR) models as a default, and the QSAR-generated data can be overwritten manually during subsequent empirical data curation efforts. We selected two US EPA QSAR software packages to initially populate the tool: TEST Version 5.1.1 and EPISuite Version 4.11. For all values except the fish bioconcentration factor (BCF), when both TEST and EPISuite provided an estimate, the TEST results were preferentially used and EPISuite results filled data gaps left by TEST. We implemented this priority scheme in reverse for BCF, using the Arnot-Gobas Upper Trophic estimate preferentially. TEST results were directly used in the tool. We programmed the tool to extract empirical and modeled data from EPISuite's output reports. Many QSARs rely on the octanol-water partition coefficient, which is not meaningful for surfactants due to surface activity and micelle formation, so we superseded model results with empirical data for ecotoxicity values for surfactants. We identified surface active substances using the EU Cosmetics Ingredients (CosIng) internet database, where "surfactant" is identified as a functional category for surface active PCP ingredients.

For polymers and inorganic substances, predictive modeling options are limited, so a combination of empirical data and default values recommended for regulatory assessments were used, requiring a higher level of data curation. For mixtures of homologous compounds and substances of unknown or variable composition, complex reaction products or biological materials (UVCBs) where the major components were known a base-case ranking approach for one to three representative compounds were used and the poorest rank among them was adopted to represent the ingredient mixture's rank.

## Deviations from Okonski et al. (2021) Method for PNEC Development

We implemented the method of Okonski et al. (2021) with the following changes to facilitate automation, though the unabridged method or a different approach for determining the PNEC, e.g., a species-sensitivity distribution, can be used by overriding the automatically calculated value. For pragmatism, a total of nine aquatic toxicity tests— three acute, three intermediate, and three chronic— is the maximum automatically considered for selection of the critical toxicity value rather than an unlimited number. For the few ingredients with more available data, additional data must be included manually. If no manual entry is made, the tool assumes there is one test result available for each trophic level, resulting in a more conservative AF and PNEC. The mode of action is assigned using output from the TEST or ECOSAR model as described in SI. Values for the Fmoa parameter are: 1 for narcosis, 5 for

non-narcosis, and guidance in the tool advises assigning a larger value if warranted (e.g., endocrine effects known but not captured in the data set).

### **Mode of Action Determination**

The mode of action is assigned in the tool using the Fathead Minnow LC50 “Mode of Action” model in the TEST software package. For data gaps, the ECOSAR module of EPISuite was used. For substances with a mode of action listed as “Narcosis” (TEST) or only “Baseline” in ECOSAR, the Fmoa value (the mode of action portion of the AF) was assigned a value of one. If the mode of action in TEST was anything other than “Narcosis,” or if ECOSAR suggested QSAR models besides baseline toxicity, or if there is no prediction in TEST or ECOSAR, the Fmoa value was set to 5. The tool suggests curation by the user to assign a higher value for Fmoa when warranted, e.g. in the case of endocrine disrupting compounds where the data set does not adequately capture endocrine effects.

### **Ecotoxicity in Sediment and Soil**

Toxicity to sediment organisms is considered for non-readily biodegradable substances where the EPISuite Fugacity model predicts that  $\geq 10\%$  of the emitted mass would partition to sediment. The Fugacity model is run using default parameters, except with emissions to soil and air changed to zero (i.e., 100% of emissions to water). The 10% threshold was selected with reference to the EU Medicines Agency ERA guidelines (EMA, 2006), in which the sediment effects pathway is only considered if  $\geq 10\%$  of a medicinal substance partitions to sediment during laboratory simulation testing. Similarly, toxicity to soil organisms is considered for non-readily biodegradable substances where the EPISuite Sewage Treatment Plant (STP) model predicts that  $\geq 10\%$  of the emitted mass would partition to biosolids in STPs, hence potentially reach soil amended with biosolids as fertilizer. There is no “credit” given for loss of the substance to biosolids in the STP, reducing the proportion of the substance available to sediment, because this process varies among localities. In some areas, STPs only provide primary treatment, limiting the opportunity for partitioning losses during treatment, and in others with combined sewers, STP bypasses are common during wet weather events (Phillips et al, 2012). As a result, even though areas served by efficient STPs would have mitigated exposure in sediments; in other areas with less efficient STPs or frequent bypasses, sediment exposure would still occur.

### **Persistence of Non-Readily Biodegradable Substances**

Non-readily biodegradable substances are evaluated for persistence in multiple media as follows: for all substances, by their half-life in water, and for substances that partition to sediment or soil  $\geq 10\%$  (as described in Section 3.2.1), also by their half-life in sediment and/or soil. As a default in the ranking tool, the US EPA EPISuite Fugacity model’s method was used as the basis for assigning half-life values in water with two modifications: (1) the change recommended by Aronson et al. (2006) was used (i.e., BIOWIN result of “months” correlates to a duration of 120 days rather than the default value in EPISuite), and (2) rather than using discrete bins to relate BIOWIN 3 (ultimate biodegradation expert survey) model results to half-life values, a regression model was developed to create a continuous

function for determining the half-life in water from BIOWIN 3 output, shown in Table S4 – Derivation of Aqueous Half-Life Model. For sediment, the half-life is assumed to be the aqueous half-life multiplied by nine, and for soil, the half-life is assumed to be the aqueous half-life multiplied by 2, which are the default for these parameters in the Fugacity model (See Table S6 – Default Values and Practices).

### **Minor Ingredients Neglected in Product Ranks**

The results in Tables S7 and S8 include 94.5% or more of the ingredients (dry weight basis), because the rank cannot be mathematically altered by a fraction of the formula less than 5.5%. Hence, the smallest components of each formula were neglected, leaving at least 94.5% of the total weight evaluated.

### **References**

Phillips PJ, Chalmers AT, Gray L, Kolpin DW, Foreman WT, Wall GR. 2012. Combined Sewer Overflows: An Environmental Source of Hormones. *Environ. Sci. Technol.* 46:5336–5343. doi: 10.1021/es3001294

**Example Calculation, Base-Case****Phenoxyethanol, CAS RN 122-99-6**

Shaded tables show values from the tool's spreadsheet used to calculate the outcome

**Ecotoxicity Sub-Rank Value Determination**

PNEC calculation adapted from Okonski et al. 2021

Aquatic toxicity (E/M = empirical/modeled)

**Acute values (mg/L)**

| Fish LC50 | E/M | Source | Daphnia EC50 | E/M | Source | Algae EC50 | E/M | Source | SEV1  |
|-----------|-----|--------|--------------|-----|--------|------------|-----|--------|-------|
| 343.91    | E   | TEST   | 91.77        | M   | TEST   | 381.272    | M   | ECOSAR | 9.177 |

**Subchronic/intermediate values (mg/L)**

| Fish LC50 | E/M | Source | Daphnia EC50 | E/M | Source | Algae EC50 | E/M | Source | SEV2 |
|-----------|-----|--------|--------------|-----|--------|------------|-----|--------|------|
|           |     |        |              |     |        |            |     |        |      |

**Chronic values (mg/L)**

| Fish ChV | E/M | Source | Daphnia ChV | E/M | Source | Algae ChV | E/M | Source | SEV3   |
|----------|-----|--------|-------------|-----|--------|-----------|-----|--------|--------|
| 64.663   | M   | ECOSAR | 29.506      | M   | ECOSAR | 43.843    | M   | ECOSAR | 29.506 |

**PNEC Determination**

| SEVf  | CTV   | Critical Species |
|-------|-------|------------------|
| 9.177 | 91.77 | Primary consumer |

| Fes | Fsv | MOA      | Source | Fmoa | AF | PNEC <sub>aq</sub> |
|-----|-----|----------|--------|------|----|--------------------|
| 10  | 5   | Narcosis | TEST   | 1    | 50 | 1.835              |

**Partitioning prediction from EPISuite STP and fugacity models**

| Water% | Sediment% | Soil% |
|--------|-----------|-------|
| 99.134 | 0.207     | 0.667 |

% soil = % in sludge biosolids in STP model

% water, % sed = %water, %sed from EPI Suite fugacity model × (100% - % in biosolids)/100%

No adjustment made for STP biodegradation losses, because  
some locales have poor STP removal or frequent wet weather bypasses

< 10% predicted in sediment --> no sediment PNEC needed

< 10% predicted in biosolids (sludge) --> no soil PNEC needed

**Soil and Sediment PNEC (mg/kg) demonstration (not required for phenoxyethanol)**

| log K <sub>oc</sub> | E/M | Source |
|---------------------|-----|--------|
| 1.174               | M   | KOCWIN |

$$\text{PNEC}_{\text{soil}} = \text{PNEC}_{\text{aq}} \times (0.01764 \times K_{\text{oc}} + 0.1176)$$

$$\text{PNEC}_{\text{sed}} = \text{PNEC}_{\text{aq}} \times (0.0217 \times K_{\text{oc}} + 0.783)$$

| PNEC <sub>soil</sub> | PNEC <sub>sed</sub> |
|----------------------|---------------------|
| 0.699                | 2.032               |

**PNEC scaled to obtain Ecotoxicity Sub-rank Value (SRV)**

$$\text{SRV}_{\text{aq}} = 1.355 - 4.5 \times \log(\text{PNEC}_{\text{aq}})$$

$$\text{SRV}_{\text{soil/sed}} = 6.274 - 2.726 \times \log(\text{PNEC}_{\text{soil/sed}})$$

overall SRV = minimum SRV (water, sediment, soil)

| SRV ecotox |
|------------|
| 0.168      |

**Persistence Sub-Rank Value Determination**

Ready Biodegradability Prediction from US EPA BIOWIN model

| BIOWIN3 | BIOWIN 5 | Ready Bio |
|---------|----------|-----------|
| 3.0177  | 0.7974   | Yes       |

If BIOWIN3 &gt; 2.75 and BIOWIN5 &gt; 0.5 then ready biodegradability prediction is "Yes"

**Partitioning prediction from EPISuite STP and fugacity models**

| Water% | Sediment% | Soil% |
|--------|-----------|-------|
| 99.134 | 0.207     | 0.667 |

% soil = % in sludge biosolids in STP model

% water, % sed = %water, %sed from EPI Suite fugacity model × (100% - % in biosolids)/100%

No adjustment made for STP biodegradation losses, because  
some locales have poor STP removal or frequent wet weather bypasses

&lt; 10% predicted in sediment --&gt; no sediment half-life needed

&lt; 10% predicted in biosolids (sludge) --&gt; no soil half-life needed

**Half-life values (demonstrated for all media, needed for water only in this case)**

$$t_{1/2aq} (d) = 4662.3 \times e^{(-1.916(BIOWIN3))}$$

$$t_{1/2soil} (d) = 2 \times t_{1/2aq}$$

$$t_{1/2sed} (d) = 9 \times t_{1/2aq}$$

| Water t1/2 | Sed t1/2 | Soil t1/2 |
|------------|----------|-----------|
| 14.373     | 129.357  | 28.746    |

**Half-life scaled to obtain Persistence Sub-rank Value (SRV)**Readily Biodegradable or  $t_{1/2} < 7$  d --> SRV<sub>aq</sub> = 0 $t_{1/2} > 180$  d --> SRV<sub>aq</sub> = 9Otherwise --> SRV<sub>aq</sub> =  $2.7735 \ln(t_{1/2}) - 5.8362$ 

| Raw SRV <sub>aq</sub> | Raw SRV <sub>sed</sub> | Raw SRV <sub>soil</sub> |
|-----------------------|------------------------|-------------------------|
| 0                     | not used               | not used                |

SRV contribution from each compartment (weighted SRV) = SRV<sub>compartment</sub> × % in compartment/% considerede.g., for water, weighted SRV<sub>aq</sub> =  $0 \times 99.135\% / (99.135\% + 0.207\% + 0.667\%)$ 

% considered can be &lt; 100% due to volatilization

| Wtd SRV <sub>aq</sub> | Wtd SRV <sub>sed</sub> | Wtd SRV <sub>soil</sub> |
|-----------------------|------------------------|-------------------------|
| 0                     | not used               | not used                |

| SRV persist |
|-------------|
| 0           |

**Bioaccumulation Potential Sub-Rank Value Determination****Check for ready biodegradability and molecular weight cutoff**

| Mol wt  | Ready Bio |
|---------|-----------|
| 138.170 | Yes       |

**Bioaccumulation Potential SRV determination**

If mol. wt. &gt; 1000 OR readily biodegradable = "yes", SRV = 0

Otherwise, check fish bioconcentration factor (BCF)

BCF and decision criteria shown below, but not needed in this case because prediction is readily biodegradable

| BCF   | E/M | Source    |
|-------|-----|-----------|
| 2.438 | M   | EPI Suite |

If  $BCF < 100$ ,  $SRV = 0$

If  $BCF > 5000$ ,  $SRV = 9$

Otherwise  $SRV = -10.5 + 5.258 \times \log(BCF)$

| SRV bioacc |
|------------|
| 0          |

### **Rarer Impacts SRV determination**

#### **Local Potential Impact, Subsurface Mobility**

Check half-life in water

If  $t_{1/2aq} < 60$  d, PI-indicator is "No"

If  $t_{1/2aq} \geq 60$  d, check water solubility (WS) and organic carbon partition coefficient (Koc)

| Water t1/2 |
|------------|
| 14.37      |

In this case,  $t_{1/2aq} < 60$  d, so PI-indicator is "No"

WS, Koc and decision criteria shown below, but not needed in this case

| WS (mg/L) | E/M | Source | log Koc | E/M | Source    |
|-----------|-----|--------|---------|-----|-----------|
| 26695.94  | E   | TEST   | 1.19    | M   | EPI Suite |

If  $WS < 0.15$  mg/L or if  $\log Koc > 4$ , PI-indicator is "No"

Otherwise, PI-indicator is "yes"

#### **Local Potential Impact, Ground Level Photochemical Ozone Formation**

Check normal boiling point (BP)

If  $BP \leq 250$  °C, check ReCiPe model photochemical ozone formation list or MIR List produced by the California Air Resources Board (CARB)

| BP degC | E/M | BP source |
|---------|-----|-----------|
| 245.00  | E   | TEST      |

Phenoxyethanol is listed as a potential source of photochemical ozone by CARB

PI-indicator is "Yes"

#### **Local Potential Impact, Eutrophication**

Check SMILES structure for the presence of phosphorus

| SMILES (Unique) |
|-----------------|
| OCCOC1=CC=CC=C1 |

Phosphorus is not present so PI-indicator is "No"

#### **Global Potential Impacts: Climate Change, Stratospheric Ozone Depletion**

Check ReCiPe model to see if substance is on the list of greenhouse gases or ozone depleters

Phenoxyethanol is not on either list, so the PI-indicator is "No"

**Global Potential Impact, Mineral Resource Depletion**

Check SMILES structure for elements on the Crustal Scarcity Potentials (CSPs) from Arvidsson et al. (2021)

Include all with a value > CSP for Zn, but excluding N

Phenoxyethanol does not include any minerals on the list, so the PI-indicator is "No"

**Totals for Rarer Potential Impacts**

0 global potential impacts, 1 local potential impact

For one local impact, SRV = 4, for two or more local impacts, SRV = 9

For one or more global impacts, SRV = 9

| SRV rarer |
|-----------|
| 4         |

**Final Rank Determination**

All SRV values are incremented by one for presentation to end users, changing from a scale of 0-9 to a scale of 1-10

| SRV ecotox | SRV persist | SRV bioacc | SRV rarer |
|------------|-------------|------------|-----------|
| 1          | 1           | 1          | 5         |

Multiply SRVs by weighting factors and round to a whole number to achieve final ingredient rank

| Eco wt | Persist wt | Bioacc wt | Rarer wt |
|--------|------------|-----------|----------|
| 30%    | 30%        | 20%       | 20%      |

| Final rank |
|------------|
| 2          |

**Table S1 Weighting Factors**

| Outcome                                             | Variables or Parameters Used                    | Weight Value Used                 | Reason                                                                                                                                                                                          |
|-----------------------------------------------------|-------------------------------------------------|-----------------------------------|-------------------------------------------------------------------------------------------------------------------------------------------------------------------------------------------------|
| <b>Final Rank Value - Base Case</b>                 | Toxicity                                        | 30%                               | Identified as important impact category in shampoo life cycle assessment                                                                                                                        |
|                                                     | Bioaccumulation                                 | 20%                               | Global endpoint of concern; impacts sensitive top predators and difficult to reverse                                                                                                            |
|                                                     | Persistence                                     | 30%                               | Pre-requisite for all adverse effects; Surrogate for unanticipated adverse effects to ecosystems                                                                                                |
|                                                     | Rarer Impacts Cluster                           | 20%                               | Less common; grouped because considering separately creates rankings with less sensitivity                                                                                                      |
|                                                     | Soil Mobility                                   | Decrements Cluster Sub-Rank by 5  | Impact dependent on local environment's susceptibility                                                                                                                                          |
|                                                     | Ground-Level Photochemical Ozone (Smog)         | Decrements Cluster Sub-Rank by 5  | Impact dependent on local environment's susceptibility                                                                                                                                          |
|                                                     | Eutrophication                                  | Decrements Cluster Sub-Rank by 5  | Impact dependent on local environment's susceptibility                                                                                                                                          |
|                                                     | Climate Change (Direct Greenhouse Gas Emission) | Decrements Cluster Sub-Rank by 10 | Global impact                                                                                                                                                                                   |
|                                                     | Stratospheric Ozone Depletion (Direct Emission) | Decrements Cluster Sub-Rank by 10 | Global impact                                                                                                                                                                                   |
|                                                     | Mineral Resource Depletion                      | Decrements Cluster Sub-Rank by 10 | Global impact                                                                                                                                                                                   |
|                                                     | Other                                           | User-determined based on impact   | Can be local or global depending on nature of the impact identified                                                                                                                             |
| <b>Final Rank Value - Polymer</b>                   | Rank Value - Polymer                            | 70%                               | Relatively high uncertainty about degradation mechanisms, rate, and risk from fragments, so weight is biased more heavily toward the Rank Value of the emitted substance                        |
|                                                     | Rank Value - Polymer Fragment of Concern        | 30%                               |                                                                                                                                                                                                 |
| <b>Final Rank Value - Inorganic/Organometallics</b> |                                                 |                                   |                                                                                                                                                                                                 |
| Case 1: Rapidly and Completely Dissociates          | Rank Value - Inorganic/Organometallic           | 0%                                | The substance listed on the label dissociates completely in the product or immediately after use in water, so only the transformation products are relevant (e.g., NaOH used for pH adjustment) |
|                                                     | Rank Value - Metal of Concern                   | 100%                              |                                                                                                                                                                                                 |
| Case 2: Measureable Dissociation                    | Rank Value - Inorganic/Organometallic           | 70%                               | Less uncertainty about transformation and risk of transformation products, but rate of dissolution is extremely slow, mitigating risk                                                           |
|                                                     | Rank Value - Metal of Concern                   | 30%                               |                                                                                                                                                                                                 |
| Case 3: No Measureable Dissociation                 | Rank Value - Inorganic/Organometallic           | 90%                               | Less uncertainty about transformation and risk of transformation products, but rate of dissolution is extremely slow, mitigating risk                                                           |
|                                                     | Rank Value - Metal of Concern                   | 10%                               |                                                                                                                                                                                                 |



**Table S2 Assessment Triggers**

| Decision Triggered                        | Triggering Conditions                                                                                                                                          | Actions Taken                                                                    |
|-------------------------------------------|----------------------------------------------------------------------------------------------------------------------------------------------------------------|----------------------------------------------------------------------------------|
| <b>Environmental fate-related</b>         |                                                                                                                                                                |                                                                                  |
| Water pathway considered                  | All non-polymeric substances<br>Anionic polymers unless empirical data indicates "insoluble"<br>Other polymers if empirical data does not indicate "insoluble" | Aquatic toxicity and persistence sub-ranks are included in the final rank value  |
| Soil pathway considered                   | EPISuite STP model indicates $\geq 10\%$ partitions to sludge                                                                                                  | Soil toxicity and persistence sub-ranks are included in the final rank value     |
| Sediment pathway considered               | EPISuite Fugacity model indicates $\geq 10\%$ partitions to sediment                                                                                           | Sediment toxicity and persistence sub-ranks are included in the final rank value |
| <b>Persistence-related</b>                |                                                                                                                                                                |                                                                                  |
| Bioaccumulation considered                | All non-readily biodegradable substances                                                                                                                       | Bioaccumulation sub-rank is included in the final rank value                     |
| Subsurface Migration evaluation started   | Substances with aqueous $t_{1/2} \geq 60$ days                                                                                                                 | Further subsurface mobility evaluation is triggered                              |
| <b>Additional Impacts-Related</b>         |                                                                                                                                                                |                                                                                  |
| Subsurface Migration determined           | Water solubility $\geq 0.15 \text{ mg L}^{-1}$ , and<br>Log $K_{oc} < 4$                                                                                       | Impact of concern decision for Subsurface Mobility toggled to "Yes"              |
| Eutrophication determined                 | Substance contains phosphorus                                                                                                                                  | Impact of concern decision for Eutrophication toggled to "Yes"                   |
| Ground-Level Ozone formation determined   | Boiling point $\leq 250 \text{ }^\circ\text{C}$ , and<br>Substance is listed as photochemical ozone former on authoritative list                               | Impact of concern decision for Ground-Level Ozone Formation toggled to "Yes"     |
| Direct Climate Change Emission determined | Substance is listed by ReCiPe model as contributing to climate change                                                                                          | Impact of concern decision for Direct Climate Change Emission toggled to "Yes"   |
| Stratospheric Ozone Depletion determined  | Substance is listed by ReCiPe model as contributing to stratospheric ozone depletion                                                                           | Impact of concern decision for Stratospheric Ozone Depletion toggled to "Yes"    |
| Mineral Resource Depletion determined     | Substance includes mineral substance with scarcity $\geq$ zinc in life cycle impact approach of Arvidsson <i>et al.</i> (2020)                                 | Impact of concern decision for Mineral Resource Depletion toggled to "Yes"       |
| Other Issue determined                    | Unique or newly emerging intrinsic hazard not captured elsewhere is identified by assessor ( <i>e.g.</i> , physical hazard)                                    | Impact of concern decision for Other Issue toggled to "Yes"                      |

**Table S3 PNEC Derivation**

| Parameter                                    | Data Type                                     | Value Used                                                      | Implementation notes                                                                                                                                                                  |
|----------------------------------------------|-----------------------------------------------|-----------------------------------------------------------------|---------------------------------------------------------------------------------------------------------------------------------------------------------------------------------------|
| <b>Aquatic Assessment Factor Components</b>  |                                               |                                                                 |                                                                                                                                                                                       |
| Endpoint standardization factor ( $F_{ES}$ ) | Acute guideline study                         | 10                                                              |                                                                                                                                                                                       |
|                                              | Acute QSAR model result                       | 10                                                              | TEST model L(E)C <sub>50</sub> preferred; Otherwise ECOSAR L(E)C <sub>50</sub>                                                                                                        |
|                                              | Suchronic study                               | 5                                                               |                                                                                                                                                                                       |
|                                              | Chronic guideline study                       | 1                                                               |                                                                                                                                                                                       |
|                                              | Chronic QSAR model result                     | 1                                                               | ECOSAR ChV                                                                                                                                                                            |
| Species variation factor ( $F_{SV}$ )        | One trophic level, one species in data set    | 50                                                              |                                                                                                                                                                                       |
|                                              | One trophic level, 2-3 species in data set    | 20                                                              |                                                                                                                                                                                       |
|                                              | One trophic level, 4-6 species in data set    | 10                                                              |                                                                                                                                                                                       |
|                                              | One trophic level, 7+ species in data set     | 5                                                               |                                                                                                                                                                                       |
|                                              | Two trophic levels, 1-2 species in data set   | 10                                                              |                                                                                                                                                                                       |
|                                              | Two trophic levels, 3-5 species in data set   | 5                                                               |                                                                                                                                                                                       |
|                                              | Two trophic levels, 6+ species in data set    | 2                                                               |                                                                                                                                                                                       |
|                                              | Three trophic levels, 3 species in data set   | 5                                                               |                                                                                                                                                                                       |
|                                              | Three trophic levels, 4-6 species in data set | 2                                                               |                                                                                                                                                                                       |
| Three trophic levels, 7+ species in data set | 1                                             |                                                                 |                                                                                                                                                                                       |
| Mode-of-action factor ( $F_{MOA}$ )          | Narcosis                                      | 1                                                               | TEST model prediction preferred; Otherwise, substances categorized only as "neutral organic" in ECOSAR                                                                                |
|                                              | Non-narcosis                                  | 5                                                               | TEST model prediction as non-narcotic preferred; Otherwise, substances categorized with models other than "neutral organic" in ECOSAR; Default for polymers                           |
|                                              | High potency mode of action                   | 50                                                              | Default value for substances with known potent toxicity (e.g., mammalian data showing endocrine disruption); Expected to be overridden manually in most cases based on empirical data |
| <b>PNECs</b>                                 |                                               |                                                                 |                                                                                                                                                                                       |
|                                              | Aquatic PNEC                                  | Critical Toxicity Value / $F_{ES} \times F_{SV} \times F_{MOA}$ | Critical Toxicity Value is determined according to the method of Okonski <i>et al.</i> (2021)                                                                                         |
|                                              | Sediment PNEC with no sediment toxicity data  | Aquatic PNEC $\times (0.0217 \times K_{oc} + 0.783)$            | Equilibrium partitioning approach from REACH guidance (ECHA-11-G-16-EN p. 39)                                                                                                         |
|                                              | Sediment PNEC with sediment toxicity data     | Critical Toxicity Value / Sediment AF                           | Selected manually by the assessor, using REACH guidance                                                                                                                               |
|                                              | Soil PNEC with no soil toxicity data          | Aquatic PNEC $\times (0.01764 \times K_{oc} + 0.1176)$          | Equilibrium partitioning approach from REACH guidance (ECHA-11-G-16-EN p. 39)                                                                                                         |
|                                              | Soil PNEC with soil toxicity data             | Critical Toxicity Value / Soil AF                               | Selected manually by the assessor, using REACH guidance                                                                                                                               |

**Table S4. Derivation of Aqueous Half-Life Model**

| Description     | BIOWIN 3 Result Range |           | Result Value | Recommended                  | Regressed                    |
|-----------------|-----------------------|-----------|--------------|------------------------------|------------------------------|
|                 | High value            | Low value | Regressed    | $t_{1/2}$ (d) <sup>[a]</sup> | $t_{1/2}$ (d) <sup>[b]</sup> |
| Recalcitrant    | 1.75                  |           | 1.5          | 180                          | 263.3                        |
| Months          | 2.25                  | 1.75      | 2            | 120                          | 101.0                        |
| Weeks to months | 2.75                  | 2.25      | 2.5          | 37.5                         | 38.8                         |
| Weeks           | 3.25                  | 2.75      | 3            | 15                           | 14.9                         |
| Days to weeks   | 3.75                  | 3.25      | 3.5          | 8.67                         | 5.7                          |
| Days            | 4.25                  | 3.75      | 4            | 2.33                         | 2.2                          |
| Hours to days   | 4.75                  | 4.25      | 4.5          | 1.25                         | 0.8                          |
| Hours           |                       | 4.75      | 5            | 0.17                         | 0.3                          |

**Notes:**

<sup>[a]</sup> Recommended in Aronson D, Boethling R, Howard P, Stiteler W. 2006. Estimating biodegradation half-lives for use in chemical screening. Chemosphere. 63:1953-1960.

<sup>[b]</sup> Regression model:  $t_{1/2}(d) = 4662.3e^{-1.916(BIOWIN3)}$  [ $R^2 = 0.94$ ]

Table S5 Scales Used to Assign Sub-Rank Values (SRVs) for the Ten Impact Categories

| Parameter                                  | Input Data Used                                                     | Sub-Rank Value (SRV)                                                                                                                                                                                             | Notes                                                                                                                                                                                                                                                                                                                                                                     |
|--------------------------------------------|---------------------------------------------------------------------|------------------------------------------------------------------------------------------------------------------------------------------------------------------------------------------------------------------|---------------------------------------------------------------------------------------------------------------------------------------------------------------------------------------------------------------------------------------------------------------------------------------------------------------------------------------------------------------------------|
| <b>Persistence</b>                         |                                                                     |                                                                                                                                                                                                                  |                                                                                                                                                                                                                                                                                                                                                                           |
| Water                                      | Readily biodegradable <sup>[a]</sup>                                | 0                                                                                                                                                                                                                |                                                                                                                                                                                                                                                                                                                                                                           |
|                                            | $t_{1/2} < 7$ days                                                  | 0                                                                                                                                                                                                                |                                                                                                                                                                                                                                                                                                                                                                           |
|                                            | $t_{1/2} = 7$ days                                                  | 1                                                                                                                                                                                                                |                                                                                                                                                                                                                                                                                                                                                                           |
|                                            | $t_{1/2} \geq 180$ days                                             | 9                                                                                                                                                                                                                |                                                                                                                                                                                                                                                                                                                                                                           |
|                                            | $7 \text{ d} < t_{1/2} < 180 \text{ days}$                          | $2.7735 \ln(t_{1/2}) - 5.8362$                                                                                                                                                                                   | Best fit equation to achieve rank = 1 for $t_{1/2} = 7$ d and rank = 9 for 180 d. Log relationship used to conform scale with PBT scales (i.e., rank increases rapidly then levels off with increasing $t_{1/2}$ to achieve poorer ranks with half-life near regulatory "P" thresholds)                                                                                   |
| Soil and Sediment                          | $t_{1/2} < 14$ days                                                 | 0                                                                                                                                                                                                                |                                                                                                                                                                                                                                                                                                                                                                           |
|                                            | $t_{1/2} \geq 180$ days                                             | 9                                                                                                                                                                                                                |                                                                                                                                                                                                                                                                                                                                                                           |
|                                            | $14 \text{ d} \leq t_{1/2} < 180 \text{ days}$                      | $2.7668 \ln(t_{1/2}) - 7.351$                                                                                                                                                                                    | Best fit equation to achieve rank = 0 for $t_{1/2} = 14$ d and rank = 9 for 365 d. Log relationship used to conform scale with PBT scales (i.e., rank increases rapidly then levels off with increasing $t_{1/2}$ to achieve poorer ranks with half-life near regulatory "P" thresholds)                                                                                  |
| Final Persistence Sub-Ranking              | SRVs for all relevant media and % of substance in relevant media    | $(\% \text{ in water} \times \text{SRV}_{\text{water}} + \% \text{ in sediment} \times \text{SRV}_{\text{sediment}} + \% \text{ in soil} \times \text{SRV}_{\text{soil}}) / \% \text{ in relevant compartments}$ | SRV values are blank for media not relevant due to low partitioning, and those terms drop out from the calculation shown                                                                                                                                                                                                                                                  |
| Polymers                                   | Readily biodegradable <sup>[a]</sup>                                | 0                                                                                                                                                                                                                |                                                                                                                                                                                                                                                                                                                                                                           |
|                                            | Inherently biodegradable                                            | 4                                                                                                                                                                                                                |                                                                                                                                                                                                                                                                                                                                                                           |
|                                            | Not readily or inherently biodegradable or no data                  | 9                                                                                                                                                                                                                |                                                                                                                                                                                                                                                                                                                                                                           |
| Inorganics                                 | Sub-Rank Values for Toxicity, Bioaccumulation, and Other            | $0.44 \times \text{SRV}_{\text{TOX}} + 0.28 \times \text{SRV}_{\text{BIOACC}} + 0.28 \times \text{SRV}_{\text{RARE}}$                                                                                            | Persistence is considered essentially infinite; but effects are typically very well understood and persistence is only a concern to the degree that there are effects expected, so focus of Ranking shifts to the other impact categories, retaining the ratio between them in the 30%/20%/20% weighting scheme for Toxicity, Bioaccumulation, and Rarer Impacts          |
| <b>Ecological Toxicity</b>                 |                                                                     |                                                                                                                                                                                                                  |                                                                                                                                                                                                                                                                                                                                                                           |
| Water                                      | $\text{PNEC} = 2 \text{ mg L}^{-1}$                                 | 0                                                                                                                                                                                                                | Equivalent to a data set with three limits tests (i.e., $\text{L(E)C}_{50} \geq 100 \text{ mg L}^{-1}$ ) for three trophic levels and three species                                                                                                                                                                                                                       |
|                                            | $\text{PNEC} = 0.02 \text{ mg L}^{-1}$                              | 9                                                                                                                                                                                                                | Equivalent to a data set of acute tests with three trophic levels and three species and a minimum $\text{L(E)C}_{50} = 1 \text{ mg L}^{-1}$                                                                                                                                                                                                                               |
|                                            | $0.02 \text{ mg L}^{-1} \leq \text{PNEC} \leq 2 \text{ mg L}^{-1}$  | $1.355 - 4.5 \times \log(\text{PNEC})$                                                                                                                                                                           | Best fit equation to achieve rank = 0 for $\text{PNEC} = 2 \text{ mg/L}$ (this would occur when $\text{L(E)C}_{50} \geq 100 \text{ mg/L}$ in tests for all three trophic levels in our PNEC derivation algorithm) and rank = 9 for $\text{PNEC} = 0.02 \text{ mg/L}$ (would occur for critical $\text{L(E)C}_{50} = 1 \text{ mg/L}$ with data from three trophic levels)  |
| Soil and Sediment                          | $\text{PNEC} = 200 \text{ mg kg}^{-1}$                              | 0                                                                                                                                                                                                                | Equivalent to aquatic $\text{PNEC} = 2 \text{ mg L}^{-1}$ and $K_{oc} = 100$ or aquatic $\text{PNEC} = 0.02 \text{ mg L}^{-1}$ and $K_{oc} = 10,000$                                                                                                                                                                                                                      |
|                                            | $\text{PNEC} = 0.1 \text{ mg kg}^{-1}$                              | 9                                                                                                                                                                                                                | Screening value in soil below which biologically potent active ingredients are not a concern in EMA veterinary guidance                                                                                                                                                                                                                                                   |
|                                            | $0.1 \text{ mg L}^{-1} \leq \text{PNEC} \leq 200 \text{ mg L}^{-1}$ | $6.274 - 2.726 \times \log(\text{PNEC})$                                                                                                                                                                         | Best fit equation to achieve rank = 0 for $\text{PNEC} = 200 \text{ mg/L}$ (this would occur when $\text{L(E)C}_{50} \geq 100 \text{ mg/L}$ in tests for all three trophic levels in our PNEC derivation algorithm) and rank = 9 for $\text{PNEC} = 0.1 \text{ mg/L}$ (would occur for critical $\text{L(E)C}_{50} = 1 \text{ mg/L}$ with data from three trophic levels) |
| Final Toxicity Sub-Ranking                 | SRVs for all relevant media                                         | Minimum ( $\text{SRV}_{\text{water}}$ , $\text{SRV}_{\text{sediment}}$ , $\text{SRV}_{\text{soil}}$ )                                                                                                            |                                                                                                                                                                                                                                                                                                                                                                           |
| <b>Bioaccumulation/Secondary Poisoning</b> |                                                                     |                                                                                                                                                                                                                  |                                                                                                                                                                                                                                                                                                                                                                           |
|                                            | Readily biodegradable <sup>[a]</sup>                                | 0                                                                                                                                                                                                                |                                                                                                                                                                                                                                                                                                                                                                           |
|                                            | Not readily biodegradable, and $\text{BCF} < 100$                   | 0                                                                                                                                                                                                                | 100 exempts a substance from PBT in GHS; 500 is "low level" of bioaccumulation in GHS                                                                                                                                                                                                                                                                                     |
|                                            | $\text{BCF} \geq 5000$                                              | 9                                                                                                                                                                                                                | 2000 is "B" and 5000 is "vB" in regulatory PBT assessment                                                                                                                                                                                                                                                                                                                 |
|                                            | $100 \leq \text{BCF} < 5000$                                        | $-10.5 + 5.258 \log(\text{BCF})$                                                                                                                                                                                 | Best fit equation to achieve rank = 0 for $\text{BCF} = 100$ , rank = 4 for $\text{BCF} = 500$ , rank = 7 for $\text{BCF} = 2000$ , and rank = 9 for $\text{BCF} = 5000$                                                                                                                                                                                                  |
| <b>Rare Impacts Cluster</b>                |                                                                     |                                                                                                                                                                                                                  |                                                                                                                                                                                                                                                                                                                                                                           |
|                                            | "No" for all Additional Impacts                                     | 0                                                                                                                                                                                                                |                                                                                                                                                                                                                                                                                                                                                                           |
|                                            | "Yes" for one local impact <sup>[b]</sup>                           | 4                                                                                                                                                                                                                |                                                                                                                                                                                                                                                                                                                                                                           |
|                                            | "Yes" for 2+ local impacts <sup>[b]</sup>                           | 9                                                                                                                                                                                                                |                                                                                                                                                                                                                                                                                                                                                                           |
|                                            | "Yes" for 1+ global impact(s) <sup>[c]</sup>                        | 9                                                                                                                                                                                                                |                                                                                                                                                                                                                                                                                                                                                                           |

**Notes:**

<sup>[a]</sup> Substances that meet all criteria for ready biodegradability except the 10-day window are considered readily biodegradable in this system

<sup>[b]</sup> Additional Impacts considered local in scale are: Subsurface Migration, Eutrophication, Ground-Level Photochemical Ozone (Smog) formation, and potentially Other Issue, depending on the impact

<sup>[c]</sup> Additional Impacts considered global in scale are: Mineral Resource Depletion, Direct Climate Change Emission, and potentially Other Issue, depending on the impact

**Table S6. Default Values and Practices**

| Parameter                                     | Default Value When No Available Data                                                                                                                       | Notes                                                                                                                                                                                                                                                                                                                         |
|-----------------------------------------------|------------------------------------------------------------------------------------------------------------------------------------------------------------|-------------------------------------------------------------------------------------------------------------------------------------------------------------------------------------------------------------------------------------------------------------------------------------------------------------------------------|
| <b>Polymers</b>                               |                                                                                                                                                            |                                                                                                                                                                                                                                                                                                                               |
| Log $K_{oc}$                                  | 4                                                                                                                                                          | US EPA TSCA: <sup>[a]</sup> "Rules of thumb are available to inform judgments about [environmental fate] processes [for polymers], but in general they are based on a heavy dose of faith and relatively few data." The dearth of data available to for polymer ERA has changed little since that was written. <sup>[b]</sup> |
| Volatility                                    | negligible                                                                                                                                                 | US EPA TSCA "polymers will tend to partition to soil, suspended particles, sediments and sludge" <sup>[a]</sup>                                                                                                                                                                                                               |
| Water solubility                              | for non-neutral polymers or reported as "soluble," WS = 1000 mg/L otherwise 0 mg/L                                                                         | US EPA TSCA: vapor pressure and Henry's Law constant < 10 <sup>-8</sup> mm Hg assumed <sup>[a]</sup>                                                                                                                                                                                                                          |
| Partitioning                                  | for soluble/dispersible anionic polymers with MW < 5000 Da, water only; for all else, water, sediment, and soil considered                                 | Source: US EPA TSCA <sup>[a]</sup>                                                                                                                                                                                                                                                                                            |
| BCF                                           | for MW > 1000 Da, BCF = 100                                                                                                                                | Source: US EPA TSCA <sup>[a]</sup>                                                                                                                                                                                                                                                                                            |
| Biodegradability                              | Slow                                                                                                                                                       | Source: US EPA TSCA <sup>[a]</sup>                                                                                                                                                                                                                                                                                            |
| Subsurface mobility                           | "Yes" if not readily biodegradable and water soluble/dispersible > 0.15 mg/L                                                                               | In contrast to US EPA TSCA: <sup>[a]</sup> "for polymers it is generally assumed that releases to landfills and deep well injection do not result in significant aquatic- or terrestrial-ecological exposures" to reflect changes in thinking driven by PFAS issues                                                           |
| Aquatic toxicity                              | Negligible (Ecotoxicity sub-rank = 1) if "insoluble" regardless of charge; Read-across to closest structural analog for water soluble/dispersible polymers | Source: US EPA TSCA <sup>[a]</sup>                                                                                                                                                                                                                                                                                            |
| Identity of fragment of concern               | Monomer                                                                                                                                                    | If a specific fragment is a known concern, this used; For chemically complex polymers, several potential fragments of concern can be ranked and the poorest rank used                                                                                                                                                         |
| Rare Impacts                                  | "No"                                                                                                                                                       | Assumed that no significant impact exists if evidence is not found in sources selected (See Table S2. Assessment Triggers)                                                                                                                                                                                                    |
| Sediment $t_{1/2}$                            | 9 × Water $t_{1/2}$                                                                                                                                        | US EPA default in EPISuite                                                                                                                                                                                                                                                                                                    |
| Soil $t_{1/2}$                                | 2 × Water $t_{1/2}$                                                                                                                                        | US EPA default in EPISuite                                                                                                                                                                                                                                                                                                    |
| Rounding                                      | Only for final sub-ranks and ranks presented to the end-user                                                                                               | Sub-rank values are not rounded to whole numbers before calculation of final rank value, but sub-rank values are rounded for presentation to end-user                                                                                                                                                                         |
| Bioaccumulation sub-rank for essential metals | 0 (best)                                                                                                                                                   | BCF values are not indicative, because organisms regulate the internal concentration of essential metals, which can appear as bioaccumulation in some circumstances                                                                                                                                                           |

**Notes**

<sup>[a]</sup> Sources: Nabholz, V. Undated. P2 Assessment of Polymers A Discussion of Physical-Chemical Properties, Environmental Fate, Aquatic Toxicity, and Non-Cancer Human Health Effects of Polymers. Available (2 August 2021) at: <https://www.epa.gov/sites/default/files/2015-05/documents/07-assessmentpolymers.pdf> and Boethling RS, Nabholz JV. 1996. Environmental Assessment of Polymers Under the U.S. Toxic Substances Control Act. Available (2 August 2021) at: <https://nepis.epa.gov/>

<sup>[b]</sup> Source: European Centre for Ecotoxicology and Toxicology of Chemicals (ECETOC). 2019. The ECETOC Conceptual Framework for Polymer Risk Assessment (CF4Polymers). Technical Report No. 133-1. Brussels, May. ISSN-2079-1526-133-1

**Table S7 Ranking Results for Ten Shampoo Products**

| INCI Name                                    | Rank | Shampoo Product Name and Composition (Dry % w/w) |              |             |                |             |                |               |               |             |                     |
|----------------------------------------------|------|--------------------------------------------------|--------------|-------------|----------------|-------------|----------------|---------------|---------------|-------------|---------------------|
|                                              |      | Children's                                       | Revitalizing | Men's       | Men's Dandruff | Hair & Body | Post-Treatment | Color Protect | Color Correct | Bar         | PEFCR Model Shampoo |
| Acrylates Copolymer                          | 3    | -                                                | -            | -           | 2.6            | -           | -              | -             | -             | -           | -                   |
| Acrylates/C10-30 Alkyl Acrylate Crosspolymer | 3    | -                                                | 4.0          | -           | -              | -           | -              | -             | -             | -           | -                   |
| Agar                                         | 3    | -                                                | -            | -           | -              | -           | -              | -             | -             | 15.7        | -                   |
| Ammonium Laureth Sulfate                     | 4    | -                                                | -            | -           | -              | -           | -              | 29.6          | -             | -           | -                   |
| Cetearyl Alcohol                             | 3    | -                                                | -            | -           | -              | -           | 2.9            | -             | -             | -           | -                   |
| Citric Acid                                  | 1    | 0.9                                              | -            | 1.5         | -              | -           | -              | 1.7           | -             | -           | -                   |
| Climbazole                                   | 7    | -                                                | -            | -           | 2.9            | -           | -              | -             | -             | -           | -                   |
| Cocamide MEA                                 | 3    | -                                                | -            | -           | 11.6           | 8.5         | 17.6           | -             | -             | -           | 4.7                 |
| Cocamidopropyl Betaine                       | 3    | 30.3                                             | 5.9          | 4.8         | 13.9           | 6.3         | 14.1           | -             | -             | -           | 29.9                |
| Cocamidopropyl Hydroxysultaine               | 3    | -                                                | -            | -           | -              | -           | -              | 14.7          | -             | -           | -                   |
| Dimethicone                                  | 4    | -                                                | 2.0          | -           | -              | -           | 0.9            | -             | 2.9           | -           | 3.7                 |
| Dimethiconol                                 | 4    | -                                                | -            | -           | 5.8            | -           | 2.9            | -             | -             | -           | -                   |
| Dimethyl Lauramide/Myristamide               | 7    | -                                                | -            | 15.4        | -              | -           | -              | -             | -             | -           | -                   |
| Disodium Cocoamphodiacetate                  | 3    | -                                                | -            | -           | -              | -           | -              | 43.2          | 29.1          | -           | -                   |
| Disodium EDTA                                | 1    | 1.4                                              | -            | -           | -              | 1.2         | -              | -             | -             | -           | -                   |
| Ethylene Brassylate                          | 3    | -                                                | -            | -           | 4.4            | -           | -              | -             | -             | -           | -                   |
| Glycerin                                     | 1    | -                                                | -            | -           | -              | 11.3        | -              | -             | -             | 14.7        | -                   |
| Glyceryl Caprylate/Caprates                  | 3    | -                                                | -            | -           | -              | -           | -              | -             | -             | 5.2         | -                   |
| Glycol Distearate                            | 3    | -                                                | -            | -           | 2.9            | -           | -              | -             | -             | -           | 1.9                 |
| Glycol Stearate                              | 3    | -                                                | -            | -           | -              | -           | 2.9            | -             | 8.7           | -           | -                   |
| Guar Hydroxypropyltrimonium Chloride         | 3    | -                                                | -            | -           | 2.3            | -           | 3.5            | -             | 2.9           | -           | -                   |
| Helianthus Annuus Seed Oil                   | 3    | -                                                | -            | -           | -              | -           | -              | -             | -             | 5.2         | -                   |
| Hydrochloric Acid                            | 1    | -                                                | -            | -           | -              | -           | -              | -             | -             | -           | 3.0                 |
| Lanolin Wax                                  | 3    | -                                                | -            | -           | -              | -           | -              | -             | 2.3           | -           | -                   |
| Lauryl Lactyl Lactate                        | 3    | -                                                | -            | 2.6         | -              | -           | -              | -             | -             | 5.2         | -                   |
| Panthenol                                    | 1    | -                                                | -            | -           | -              | -           | 0.6            | -             | -             | -           | -                   |
| PEG-150 Distearate                           | 5    | 5.4                                              | -            | -           | -              | -           | -              | 2.8           | -             | -           | -                   |
| PEG-150 Pentaerythrityl Tetrastearate        | 6    | -                                                | -            | -           | -              | 1.4         | -              | -             | -             | -           | -                   |
| PEG-80 Sorbitan Laurate                      | 4    | 17.7                                             | -            | -           | -              | -           | -              | -             | -             | -           | -                   |
| Phenoxyethanol                               | 2    | 2.5                                              | -            | 1.5         | -              | -           | -              | -             | -             | -           | -                   |
| Polyquaternium-10                            | 5    | 2.9                                              | -            | -           | -              | -           | -              | -             | -             | -           | -                   |
| Polysorbate 20                               | 4    | -                                                | -            | -           | -              | 8.5         | -              | -             | -             | -           | -                   |
| PPG-12-Buteth-16                             | 6    | -                                                | -            | -           | -              | -           | 1.8            | -             | -             | -           | -                   |
| Propylene Glycol                             | 2    | -                                                | -            | -           | -              | -           | -              | -             | -             | -           | 3.7                 |
| Simmondsia Chinensis Seed Oil                | 3    | -                                                | -            | -           | -              | -           | -              | -             | -             | 5.2         | -                   |
| Sodium Chloride                              | 1    | 6.0                                              | -            | -           | 2.3            | 6.7         | 2.4            | 2.8           | -             | -           | -                   |
| Sodium C12-18 Alkyl Sulfate                  | 3    | -                                                | -            | -           | -              | -           | -              | -             | -             | 47.6        | -                   |
| Sodium Hydroxide                             | 1    | -                                                | 1.2          | -           | -              | -           | -              | -             | -             | -           | -                   |
| Sodium Laureth Sulfate                       | 3    | -                                                | 20.6         | 21.2        | 48.7           | 51.3        | 45.3           | -             | 48.8          | -           | 48.6                |
| Sodium Lauroamphoacetate                     | 1    | 5.2                                              | -            | -           | -              | -           | -              | -             | -             | -           | -                   |
| Sodium Lauryl Sulfate                        | 2    | -                                                | 61.3         | 47.7        | -              | -           | -              | -             | -             | -           | -                   |
| Sodium Trideceth Sulfate                     | 4    | 22.9                                             | -            | -           | -              | -           | -              | -             | -             | -           | -                   |
| <b>Percent Weight Considered</b>             |      | <b>95.4</b>                                      | <b>94.9</b>  | <b>94.9</b> | <b>97.5</b>    | <b>95.1</b> | <b>95.0</b>    | <b>94.9</b>   | <b>94.7</b>   | <b>99.0</b> | <b>95.5</b>         |
| <b>Overall Product Rank</b>                  |      | <b>3</b>                                         | <b>2</b>     | <b>3</b>    | <b>3</b>       | <b>3</b>    | <b>3</b>       | <b>3</b>      | <b>3</b>      | <b>3</b>    | <b>3</b>            |

**Table S8 Ranking Results for Nine Facial Makeup Products**

| INCI Name                                                     | Rank | Facial Makeup Product Name and Composition (Dry % w/w) |                 |                         |                         |                   |                  |                        |                        |                  |      |
|---------------------------------------------------------------|------|--------------------------------------------------------|-----------------|-------------------------|-------------------------|-------------------|------------------|------------------------|------------------------|------------------|------|
|                                                               |      | Foundation Stick                                       | Concealer Stick | Creamy Stick Foundation | Cream-Powder Foundation | Liquid Foundation | Liquid Concealer | Powder Cream Concealer | Thin Liquid Foundation | Light Foundation |      |
| Alcohol                                                       | 2    | -                                                      | -               | -                       | -                       | -                 | -                | -                      | -                      | 7.0              | -    |
| Aluminum Hydroxide                                            | 1    | -                                                      | -               | -                       | -                       | 0.8               | -                | -                      | -                      | -                | -    |
| Aluminum Starch Octenylsuccinate                              | 2    | 10.0                                                   | -               | -                       | -                       | -                 | -                | -                      | -                      | -                | -    |
| Aluminum Stearate                                             | 2    | -                                                      | -               | -                       | -                       | -                 | -                | -                      | -                      | -                | 2.5  |
| Beeswax                                                       | 3    | -                                                      | 6.7             | 3.0                     | -                       | -                 | -                | -                      | -                      | -                | -    |
| Boron Nitride                                                 | 4    | -                                                      | -               | 5.0                     | -                       | -                 | -                | -                      | -                      | -                | -    |
| Butylene Glycol                                               | 2    | -                                                      | -               | -                       | -                       | 15.5              | 7.5              | -                      | -                      | -                | -    |
| Butyloctyl Salicylate                                         | 3    | -                                                      | -               | -                       | -                       | -                 | -                | -                      | -                      | -                | 5.9  |
| C12-15 Alkyl Ethylhexanoate                                   | 3    | 21.5                                                   | -               | -                       | -                       | -                 | -                | -                      | -                      | -                | -    |
| C30-45 Alkyl Dimethicone                                      | 4    | -                                                      | -               | 1.5                     | -                       | -                 | -                | -                      | -                      | -                | -    |
| C30-45 Alkyl Methicone                                        | 4    | -                                                      | -               | -                       | -                       | -                 | -                | 3.4                    | -                      | -                | -    |
| Camelina Sativa Seed Oil                                      | 3    | -                                                      | -               | -                       | -                       | -                 | -                | -                      | -                      | -                | 1.1  |
| Caprylic/Capric Triglyceride                                  | 3    | -                                                      | -               | 15.9                    | -                       | -                 | -                | -                      | -                      | -                | -    |
| Cetyl Ethylhexanoate                                          | 3    | -                                                      | -               | 5.0                     | -                       | -                 | -                | -                      | -                      | -                | -    |
| Cyclohexasiloxane                                             | 6    | -                                                      | -               | -                       | -                       | -                 | -                | -                      | 41.2                   | -                | -    |
| Cyclopentasiloxane                                            | 7    | -                                                      | -               | -                       | -                       | -                 | -                | -                      | 1.7                    | 38.9             | -    |
| Dimethicone                                                   | 4    | -                                                      | -               | -                       | 15.0                    | 1.9               | 23.6             | -                      | 14.5                   | 5.3              | -    |
| Dimethicone Crosspolymer                                      | 4    | -                                                      | -               | -                       | 2.0                     | -                 | -                | -                      | -                      | -                | -    |
| Dimethicone/PEG-10/15 Crosspolymer                            | 4    | -                                                      | -               | -                       | -                       | -                 | -                | -                      | -                      | 3.2              | -    |
| Dimethicone/Vinyl Dimethicone Crosspolymer                    | 4    | -                                                      | -               | -                       | -                       | -                 | -                | -                      | 0.8                    | -                | -    |
| Disteardimonium Hectorite                                     | 3    | -                                                      | -               | -                       | -                       | -                 | 1.7              | -                      | -                      | -                | 2.1  |
| Ethyl Olivat                                                  | 3    | -                                                      | -               | -                       | -                       | -                 | -                | -                      | -                      | -                | 3.7  |
| Ethylhexyl Methoxycinnamate (Octinoxate As Active Ingredient) | 3    | 3.0                                                    | 3.0             | -                       | 3.0                     | 9.3               | -                | -                      | -                      | -                | -    |
| Ethylhexyl Palmitate                                          | 3    | -                                                      | -               | -                       | 5.0                     | -                 | -                | 32.6                   | -                      | -                | -    |
| Euphorbia Cerifera (Candelilla) Wax                           | 3    | -                                                      | -               | 3.0                     | -                       | -                 | -                | -                      | -                      | -                | -    |
| Glycerin                                                      | 1    | -                                                      | -               | -                       | -                       | 5.4               | 13.6             | -                      | 1.3                    | -                | -    |
| Glycol Stearate                                               | 3    | -                                                      | -               | -                       | -                       | 4.2               | -                | -                      | -                      | -                | -    |
| HDI/Trimethylol Hexyllactone Crosspolymer                     | 4    | -                                                      | -               | -                       | -                       | -                 | -                | -                      | 4.1                    | -                | -    |
| Iron Oxides                                                   | 1    | -                                                      | -               | 2.5                     | 14.7                    | 2.0               | 17.0             | 3.5                    | 1.3                    | 1.1              | -    |
| Isocetyl Stearate                                             | 5    | -                                                      | -               | -                       | -                       | 15.8              | -                | -                      | -                      | -                | -    |
| Isododecane                                                   | 8    | -                                                      | -               | -                       | -                       | -                 | -                | -                      | 1.9                    | -                | -    |
| Isohexadecane                                                 | 9    | -                                                      | -               | -                       | -                       | -                 | -                | -                      | 1.2                    | -                | -    |
| Isopropyl Lanolate                                            | 7    | -                                                      | 5.8             | -                       | -                       | -                 | -                | -                      | -                      | -                | -    |
| Isopropyl Palmitate                                           | 3    | -                                                      | -               | -                       | 9.4                     | -                 | -                | -                      | -                      | -                | -    |
| Isostearyl Isostearate                                        | 5    | -                                                      | -               | 24.2                    | -                       | -                 | -                | -                      | -                      | -                | -    |
| Kaolin                                                        | 1    | -                                                      | -               | -                       | 2.0                     | -                 | -                | -                      | -                      | -                | -    |
| Magnesium Aluminum Silicate                                   | 2    | -                                                      | -               | -                       | -                       | 0.9               | -                | -                      | -                      | -                | -    |
| Mica                                                          | 1    | 7.6                                                    | -               | -                       | -                       | -                 | 3.0              | 14.6                   | -                      | -                | -    |
| Nylon-12                                                      | 5    | 5.0                                                    | 6.0             | 10.0                    | 2.0                     | -                 | -                | -                      | -                      | -                | -    |
| Octyldodecyl Neopentanoate                                    | 3    | -                                                      | -               | -                       | -                       | 1.9               | -                | -                      | -                      | -                | -    |
| Octyldodecyl Oleate                                           | 3    | -                                                      | -               | -                       | -                       | -                 | -                | -                      | -                      | 1.1              | -    |
| Olea Europaea (Olive) Leaf Extract                            | 3    | -                                                      | -               | -                       | -                       | -                 | -                | -                      | -                      | -                | 3.7  |
| Ozokerite                                                     | 5    | -                                                      | 9.3             | -                       | 3.0                     | -                 | -                | -                      | -                      | -                | -    |
| PEG-10 Dimethicone                                            | 4    | -                                                      | -               | -                       | -                       | -                 | 7.8              | -                      | 3.5                    | -                | -    |
| Phenoxyethanol                                                | 2    | -                                                      | -               | -                       | -                       | -                 | -                | -                      | -                      | -                | 1.7  |
| Phenyl Trimethicone                                           | 6    | 21.5                                                   | -               | -                       | 20.0                    | -                 | 17.2             | -                      | 5.7                    | -                | -    |
| Polyethylene                                                  | 5    | 5.0                                                    | 2.3             | -                       | 6.0                     | -                 | -                | -                      | -                      | -                | -    |
| Polymethyl Methacrylate                                       | 5    | 5.0                                                    | -               | -                       | -                       | -                 | -                | -                      | -                      | -                | -    |
| Polymethylsilsesquioxane                                      | 3    | -                                                      | -               | -                       | -                       | -                 | 2.3              | -                      | -                      | -                | -    |
| Polysorbate 60                                                | 2    | -                                                      | -               | -                       | -                       | 4.5               | -                | -                      | -                      | -                | -    |
| PPG-2 Myristyl Ether Propionate                               | 3    | -                                                      | -               | -                       | -                       | 3.6               | -                | -                      | -                      | -                | -    |
| Propylene Carbonate                                           | 2    | -                                                      | -               | -                       | -                       | -                 | -                | -                      | -                      | 1.1              | -    |
| Propylene Glycol                                              | 2    | -                                                      | -               | -                       | -                       | -                 | -                | -                      | -                      | 6.3              | -    |
| Propylene Glycol Dicaprylate/Dicaprate                        | 3    | -                                                      | 10.0            | -                       | -                       | 6.2               | -                | -                      | -                      | -                | -    |
| Silica                                                        | 1    | -                                                      | 2.0             | -                       | 4.9                     | -                 | -                | -                      | -                      | 2.1              | -    |
| Sodium Chloride                                               | 1    | -                                                      | -               | -                       | -                       | -                 | 2.2              | -                      | -                      | -                | -    |
| Sorbitan Stearate                                             | 4    | -                                                      | -               | -                       | -                       | 2.8               | -                | -                      | -                      | -                | -    |
| Squalane                                                      | 5    | -                                                      | 24.6            | -                       | -                       | -                 | -                | -                      | -                      | -                | -    |
| Stearyl Dimethicone                                           | 4    | 5.0                                                    | -               | -                       | -                       | -                 | -                | -                      | -                      | -                | -    |
| Synthetic Wax                                                 | 5    | -                                                      | -               | 4.8                     | -                       | -                 | -                | -                      | -                      | -                | -    |
| Talc                                                          | 1    | -                                                      | 4.2             | 11.5                    | 3.7                     | -                 | -                | 17.9                   | -                      | -                | -    |
| Tetrahexydecyl Ascorbate                                      | 3    | -                                                      | -               | 0.5                     | -                       | -                 | -                | -                      | -                      | -                | -    |
| Thymus Vulgaris Flower/Leaf/Stem Extract                      | 3    | -                                                      | -               | -                       | -                       | -                 | -                | -                      | -                      | -                | 1.1  |
| Titanium Dioxide                                              | 1    | 12.2                                                   | 20.0            | 8.1                     | -                       | 19.7              | -                | 19.6                   | 10.4                   | 2.1              | -    |
| Tribehenin                                                    | 5    | -                                                      | -               | -                       | -                       | -                 | -                | 4.5                    | -                      | -                | -    |
| Vinyl Dimethicone Crosspolymer                                | 4    | -                                                      | -               | -                       | -                       | -                 | -                | -                      | -                      | 2.1              | -    |
| Vinyl Dimethicone/Methicone Silsesquioxane Crosspolymer       | 4    | -                                                      | -               | -                       | 2.0                     | -                 | -                | -                      | -                      | -                | -    |
| Water                                                         | 1    | -                                                      | -               | -                       | -                       | -                 | -                | -                      | 0.0                    | -                | -    |
| Zinc Oxide                                                    | 7    | -                                                      | 2.2             | -                       | 2.2                     | -                 | -                | -                      | -                      | -                | 10.1 |
| <b>Percent Weight Considered</b>                              |      | <b>95.8</b>                                            | <b>96.0</b>     | <b>94.9</b>             | <b>94.8</b>             | <b>94.5</b>       | <b>95.9</b>      | <b>96.0</b>            | <b>94.7</b>            | <b>94.8</b>      |      |
| <b>Overall Product Rank</b>                                   |      | <b>3</b>                                               | <b>4</b>        | <b>3</b>                | <b>3</b>                | <b>2</b>          | <b>3</b>         | <b>2</b>               | <b>4</b>               | <b>5</b>         |      |
